# Supplementary material for: Acetic acid lignins from Chinese quince fruit (Chaenomeles sinensis): effect of pretreatment on their structural features and antioxidant activities
Source: Royal Society of Chemistry journal article supplement (doi:10.1039/c8ra04009e), 2018-01-01
Supplement: c8ra04009e1.pdf [file c8ra04009e1.pdf]

## Supplementary information

### **Acetic acid lignins from the fruits of Chinese quince (*Chaenomeles sinensis*): Effect of pretreatment on their structural features and antioxidant activities**

Zhao Qin,<sup>a,b</sup> Zhao-Guo Zhang,<sup>b</sup> Hua-Min Liu,<sup>\*b</sup> Guang-Yong Qin,<sup>\*a</sup> Xue-De Wang<sup>b</sup>

<sup>a</sup> *School of Physics and Engineering, Zhengzhou University, Zhengzhou 450001, PR China. E-mail: qinguangyong@zzu.edu.cn*

<sup>b</sup> *College of Food Science and Technology & College of International Education, Henan University of Technology, Zhengzhou 450001, PR China. E-mail: liuhuamin5108@163.com*

### **Contents**

**Fig. S1** Total ion chromatograms of acetic acid lignin fractions by Py-GC/MS.

**Fig. S2** The structural compounds labeled in Table 2.

**Fig. S3** Molecular weight distributions of acetic acid lignin fractions.

**Table S1** Assignments of <sup>13</sup>C-<sup>1</sup>H cross signals in the HSQC spectra of acetic acid lignin fractions.

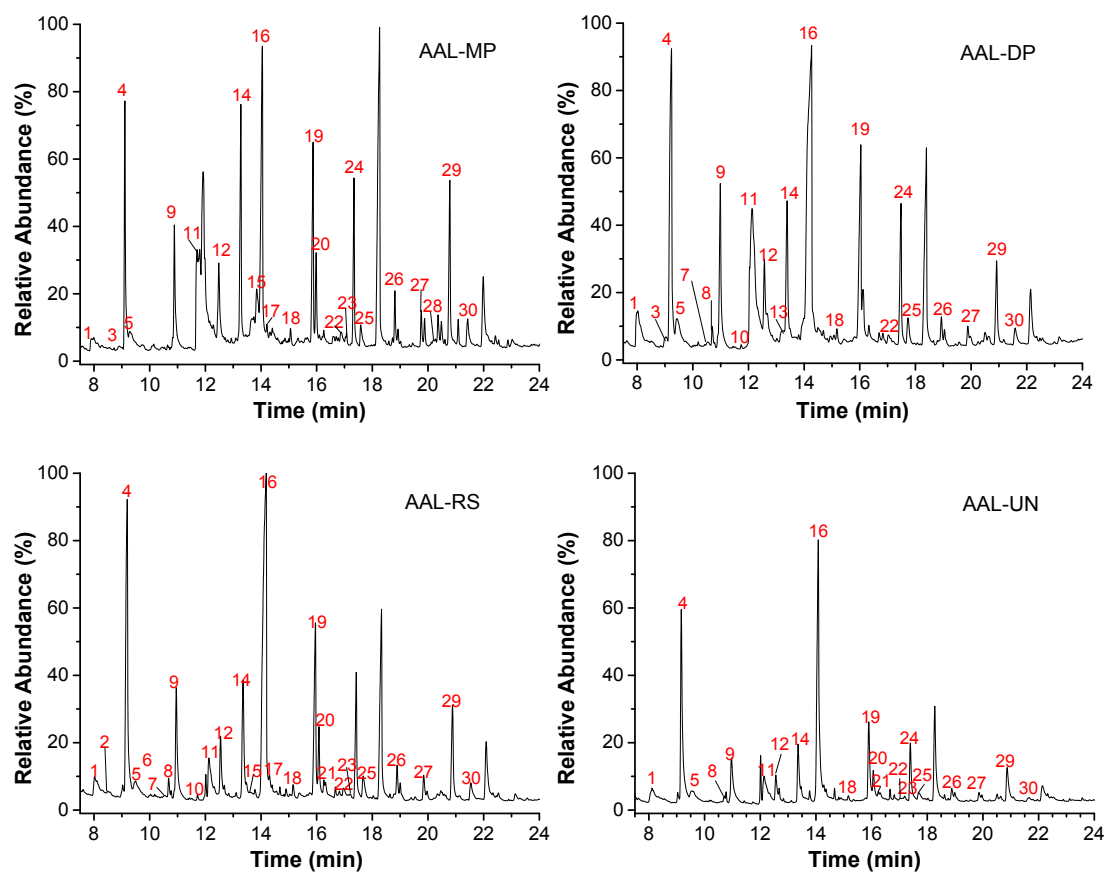

**Fig. S1** Total ion chromatograms of acetic acid lignin fractions by Py-GC/MS.

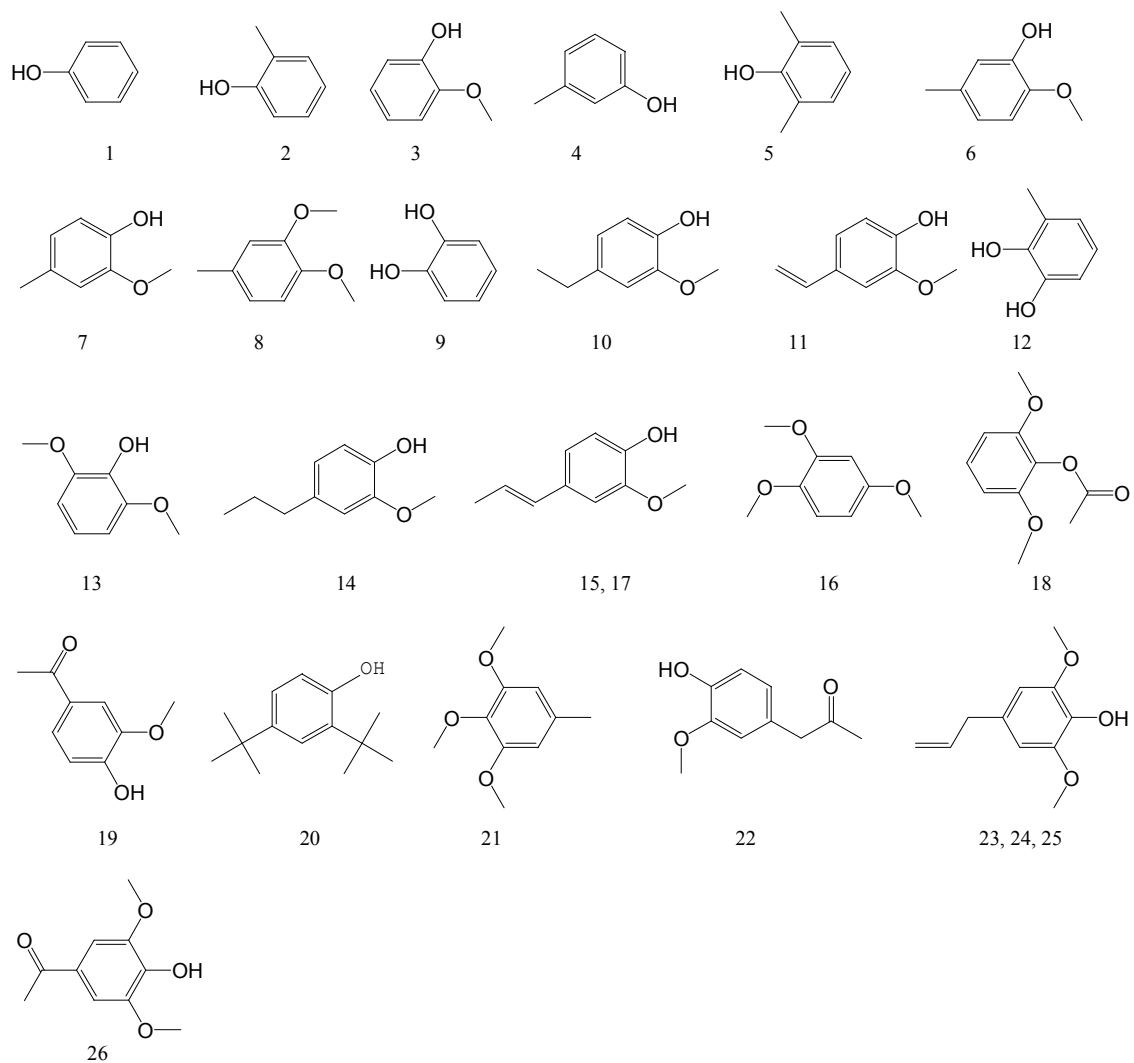

**Fig. S2** The structural compounds labeled in Table 2.

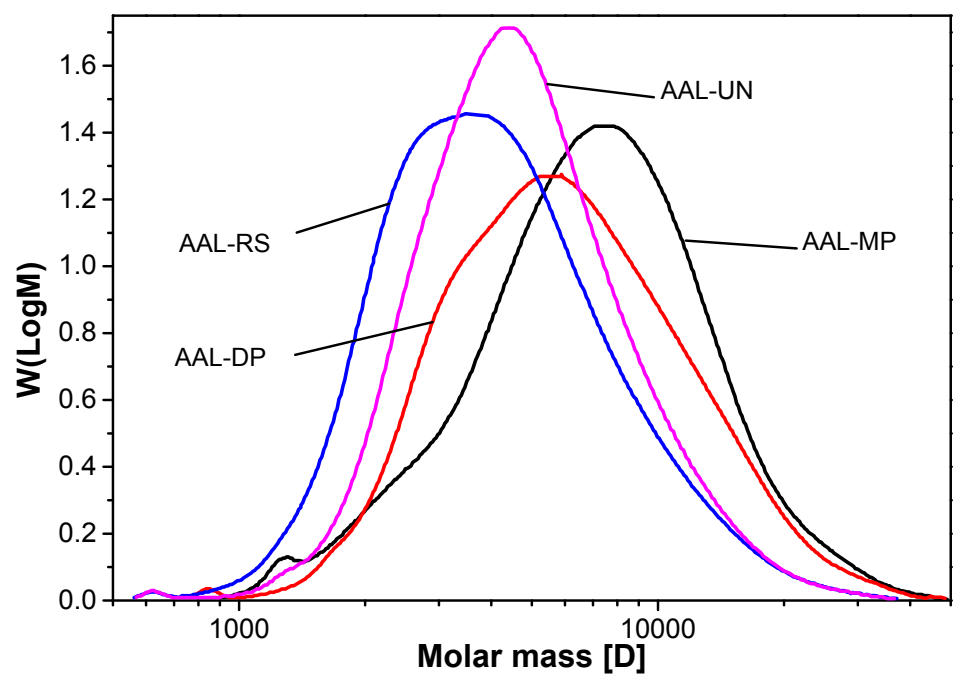

**Fig. S3** Molecular weight distributions of acetic acid lignin fractions.

**Table S1** Assignments of  $^{13}\text{C}$ - $^1\text{H}$  cross signals in the HSQC spectra of acetic acid lignin fractions.

| Label            | $\delta_{\text{C}}/\delta_{\text{H}}$ (ppm) | Assignment                                                                        |
|------------------|---------------------------------------------|-----------------------------------------------------------------------------------|
| B $_{\beta}$     | 54.3/3.01                                   | C $_{\beta}$ -H $_{\beta}$ in $\beta$ - $\beta$ (resinol) substructure (B)        |
| OCH $_3$         | 56.4/3.68                                   | C-H in methoxyls                                                                  |
| A $_{\gamma}$    | 60.1/3.29                                   | C $_{\gamma}$ -H $_{\gamma}$ in $\beta$ -O-4 substructure (A)                     |
| A' $_{\gamma}$   | 63.8/4.28                                   | C $_{\gamma}$ -H $_{\gamma}$ in $\gamma$ -acylated $\beta$ -O-4 substructure (A') |
| C $_{\gamma}$    | 63.9/3.99                                   | C $_{\gamma}$ -H $_{\gamma}$ in phenylcoumaran (C)                                |
| B $_{\gamma}$    | 71.9/3.80-4.18                              | C $_{\beta}$ -H $_{\beta}$ in $\beta$ - $\beta$ (resinol) substructure (B)        |
| A $_{\alpha}$    | 72.5/4.85                                   | C $_{\alpha}$ -H $_{\alpha}$ in $\beta$ -O-4 substructure (A)                     |
| A $_{\beta}$ (G) | 83.9/4.32                                   | C $_{\beta}$ -H $_{\beta}$ in $\beta$ -O-4 substructure linked to G (A)           |
| B $_{\alpha}$    | 86.1/4.64                                   | C $_{\alpha}$ -H $_{\alpha}$ in $\beta$ - $\beta$ (resinol) substructure (B)      |
| S $_{2,6}$       | 104.5/6.64                                  | C $_{2,6}$ -H $_{2,6}$ in syringyl unit (S)                                       |
| G $_2$           | 112.4/6.93                                  | C $_2$ -H $_2$ in guaiacyl unit (G)                                               |
| G $_5$           | 115.9/6.70                                  | C $_5$ -H $_5$ in guaiacyl unit (G)                                               |
| G $_6$           | 119.4/6.74                                  | C $_6$ -H $_6$ in guaiacyl unit (G)                                               |
| H $_{2,6}$       | 129.4/7.21                                  | C $_{2,6}$ -H $_{2,6}$ in phydroxyphenyl units (H)                                |
